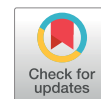

# Erratum

**Erratum. Application of Zone Model Predictive Control Artificial Pancreas During Extended Use of Infusion Set and Sensor: A Randomized Crossover-Controlled Home-Use Trial. Diabetes Care 2017;40:1096–1102**

<https://doi.org/10.2337/dc17-er11a>

*Gregory P. Forlenza, Sunil Deshpande, Trang T. Ly, Daniel P. Howsmon, Faye Cameron, Nihat Baysal, Eric Mauritzen, Tatiana Marcal, Lindsey Towers, B. Wayne Bequette, Lauren M. Huyett, Jordan E. Pinsker, Ravi Gondhalekar, Francis J. Doyle III, David M. Maahs, Bruce A. Buckingham, and Eyal Dassau*

In the above-mentioned article, the supplementary data had the incorrect figure listed for Supplementary Fig. 3. The correct figure is presented below.

The online version has been corrected to reflect this change.

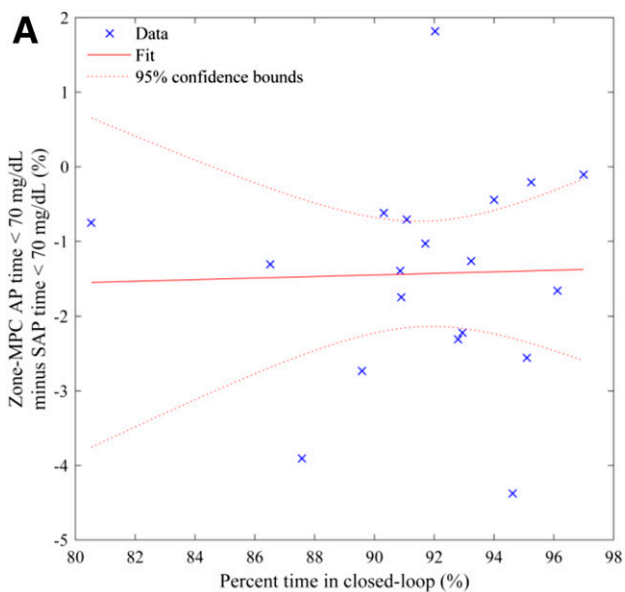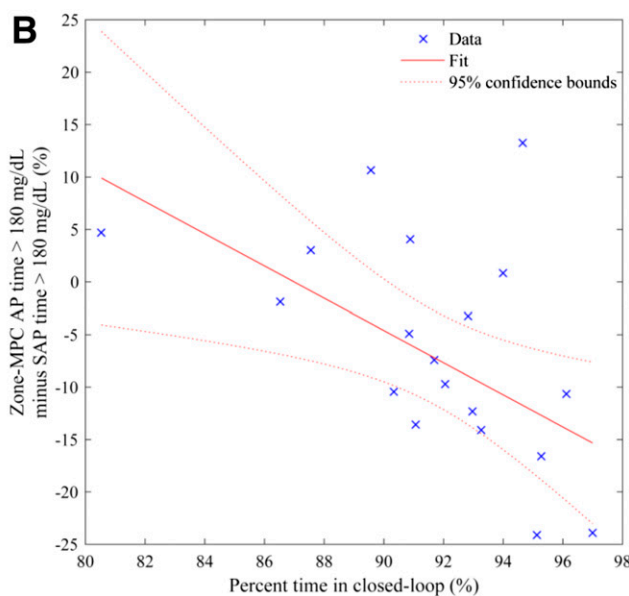

Downloaded from <http://ada.silverchair.com/care/article-pdf/40/11/1606/552070/doi17er11a.pdf>

ERRATUM
